# Supplementary material for: Structure-Activity Investigations and Optimisations of Non-metabolite Agonists for the Succinate Receptor 1
Source: PubMed Central journal article supplement (PMC6030209; doi:10.1038/s41598-018-28263-7), 2018-07-03
Supplement: 41598_2018_28263_MOESM1_ESM.pdf [file 41598_2018_28263_MOESM1_ESM.pdf]

## Supporting Information

# Structure-Activity Investigations and Optimisations of Non-metabolite Agonists for the Succinate Receptor 1

*Elisabeth Rexen Ulven<sup>†\*</sup>, Mette Traulsen<sup>‡</sup>, Matjaz Brvar<sup>†</sup>, Michael Lückmann<sup>§</sup>, Line Ø. Bielefeldt<sup>†</sup>, Lisa K. I. Jensen<sup>†</sup>, Thue W. Schwartz<sup>‡,§</sup>, Thomas M. Frimurer<sup>‡</sup>*

<sup>†</sup>Department of Physics, Chemistry and Pharmacy, University of Southern Denmark, Campusvej 55, 5230 Odense M, Denmark

<sup>‡</sup>NNF Center for Basic Metabolic Research, Section for Metabolic Receptology, Faculty of Health and Medical Sciences, University of Copenhagen, Blegdamsvej 3, 2200 Copenhagen, Denmark

<sup>§</sup>Laboratory for Molecular Pharmacology, Department of Biomedical Research, Faculty of Health and Medical Sciences, University of Copenhagen, Blegdamsvej 3, 2200 Copenhagen, Denmark

## Contents

|                                |    |
|--------------------------------|----|
| Supplementary Figure S1        | S2 |
| Table of compounds for ALiBERO | S3 |
| Supplementary Figure S2        | S4 |

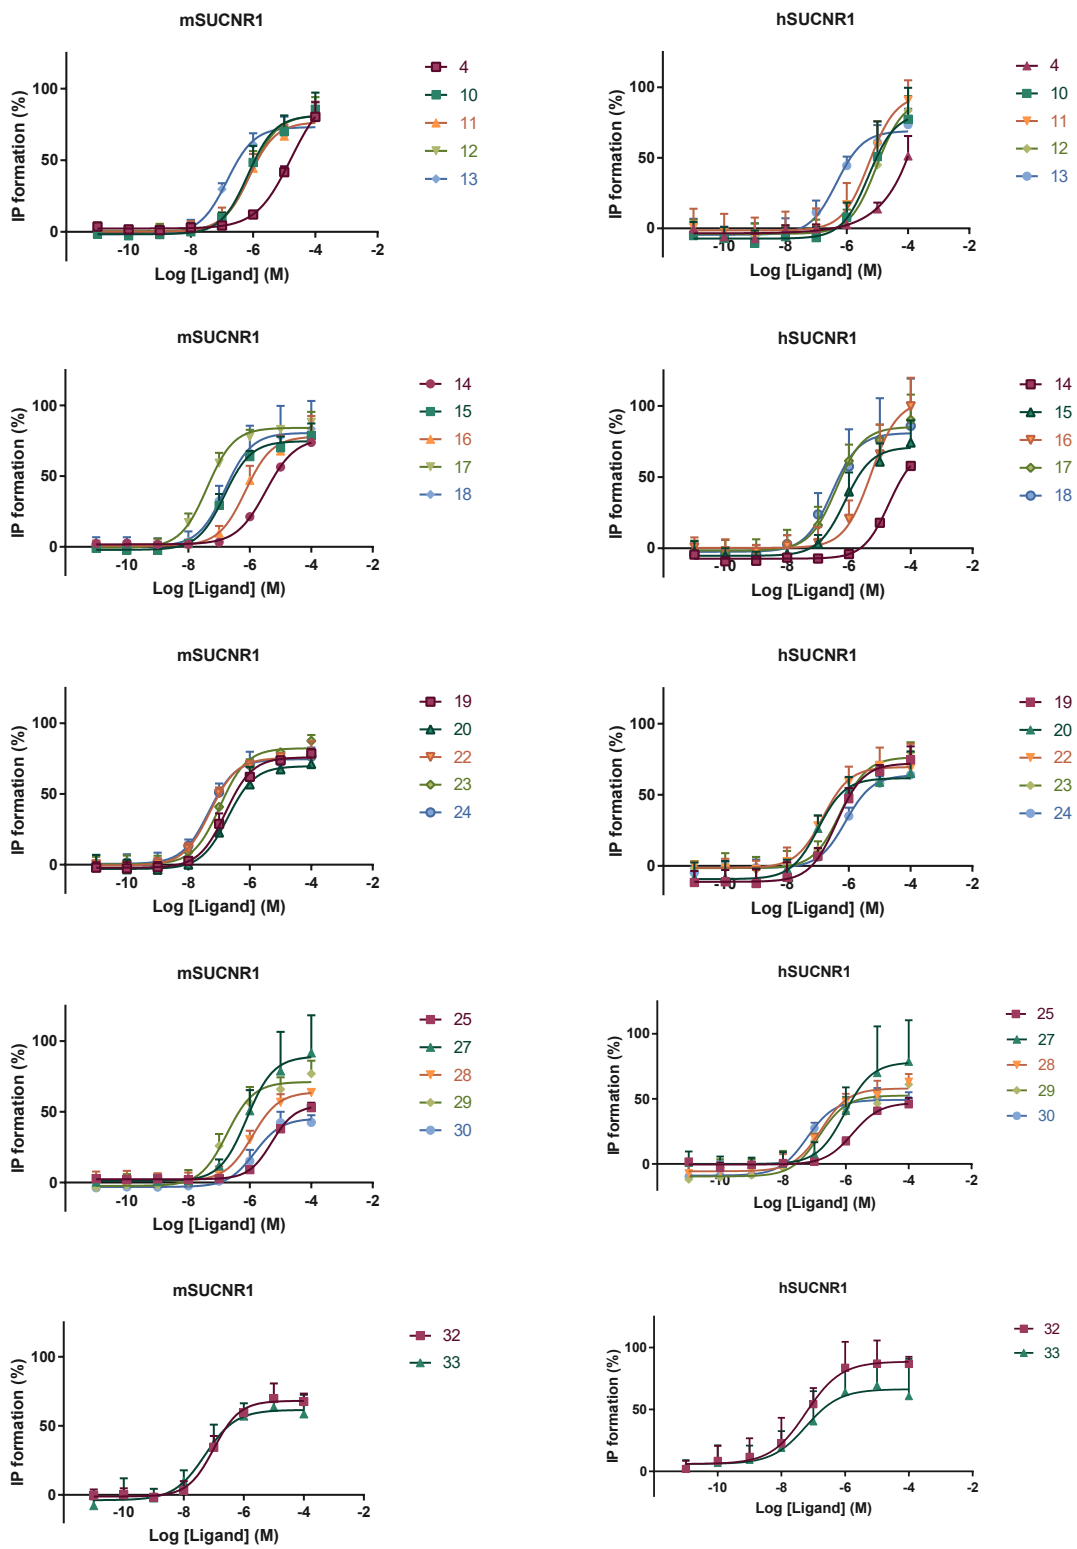

Figure S1: Dose-response curves of active compounds on mSUCNR1 and hSUCNR1.

**Table S1:** Training set used for ALiBERO optimisation and small-scale virtual ligand screening evaluation of receptor pocket ensembles. Compounds were divided into active (1) and inactive (0) based on an EC<sub>50</sub> threshold of 10 μM.

| Structure (smiles)                                                           | Cmpd ID  | Active |
|------------------------------------------------------------------------------|----------|--------|
| <chem>C(C([O-])=O)[C@H](C([O-])=O)NC(COC1ccc(cc1[Cl]))[Cl]=O</chem>          | (R)-184  | 1      |
| <chem>C(C([O-])=O)[C@@H](C([O-])=O)NC(COC1ccc(cc1[Cl]))[Cl]=O</chem>         | (S)-184  | 1      |
| <chem>C(C([O-])=O)[C@H](C([O-])=O)NC(c1ccc(c2ccc(cc2)F)o1)=O</chem>          | (R)-130  | 1      |
| <chem>C(C([O-])=O)[C@@H](C([O-])=O)NC(c1ccc(c2ccc(cc2)F)o1)=O</chem>         | 3        | 1      |
| <chem>C(C([O-])=O)[C@@H](C([O-])=O)NC(c1ccc(o1)[Br])=O</chem>                | 4        | 0      |
| <chem>C(C([O-])=O)[C@@H](C([O-])=O)NC(c1ccccc1[Cl])=O</chem>                 | 5        | 0      |
| <chem>C(C([O-])=O)[C@@H](C([O-])=O)NC(c1ccccc1)=O</chem>                     | 6        | 0      |
| <chem>C(C([O-])=O)[C@@H](C([O-])=O)NC(c1ccc(cc1)[Br])=O</chem>               | 7        | 0      |
| <chem>C(C(N[C@@H](CC([O-])=O)C([O-])=O)c1ccc(cc1)[Br]</chem>                 | 8        | 0      |
| <chem>C(C(N[C@@H](CC([O-])=O)C([O-])=O)c1ccc(cc1)c1ccc(cc1)F</chem>          | 9        | 0      |
| <chem>C(C([O-])=O)[C@@H](C([O-])=O)NC(c1ccc(c2ccccc2)o1)=O</chem>            | 10       | 1      |
| <chem>Cc1ccccc1c1ccc(C(N[C@@H](CC([O-])=O)C([O-])=O)o1</chem>                | 11       | 1      |
| <chem>Cc1ccccc1c1ccc(C(N[C@@H](CC([O-])=O)C([O-])=O)o1</chem>                | 12       | 1      |
| <chem>Cc1ccc(cc1)c1ccc(C(N[C@@H](CC([O-])=O)C([O-])=O)o1</chem>              | 13       | 1      |
| <chem>C(C([O-])=O)[C@@H](C([O-])=O)NC(c1ccc(c2cccc(CO)c2)o1)=O</chem>        | 14       | 1      |
| <chem>C(C([O-])=O)[C@@H](C([O-])=O)NC(c1ccc(c2ccc(cc2)O)o1)=O</chem>         | 15       | 1      |
| <chem>COC1ccccc1c1ccc(C(N[C@@H](CC([O-])=O)C([O-])=O)o1</chem>               | 16       | 1      |
| <chem>COC1ccc(cc1)c1ccc(C(N[C@@H](CC([O-])=O)C([O-])=O)o1</chem>             | 17       | 1      |
| <chem>C(C([O-])=O)[C@@H](C([O-])=O)NC(c1ccc(c2ccc(cc2)C(F)F)o1)=O</chem>     | 18       | 1      |
| <chem>C(C([O-])=O)[C@@H](C([O-])=O)NC(c1ccc(c2ccc(C#N)cc2)o1)=O</chem>       | 19       | 1      |
| <chem>C(C([O-])=O)[C@@H](C([O-])=O)NC(c1ccc(c2ccc(cc2)OC(F)F)o1)=O</chem>    | 20       | 1      |
| <chem>CCOC1ccc(cc1)c1ccc(C(N[C@@H](CC([O-])=O)C([O-])=O)o1</chem>            | 21       | 1      |
| <chem>CC(C)OC1ccc(cc1)c1ccc(C(N[C@@H](CC([O-])=O)C([O-])=O)o1</chem>         | 22       | 1      |
| <chem>CC1(COC1)COC1ccc(cc1)c1ccc(C(N[C@@H](CC([O-])=O)C([O-])=O)o1</chem>    | 23       | 1      |
| <chem>CS(CCCOC1ccc(cc1)c1ccc(C(N[C@@H](CC([O-])=O)C([O-])=O)o1)(=O)=O</chem> | 24       | 1      |
| <chem>C(C([O-])=O)[C@@H](C([O-])=O)NC(c1ccc(c1)c1ccc(cc1)F)=O</chem>         | 25       | 1      |
| <chem>C(C([O-])=O)[C@@H](C([O-])=O)NC(c1ccc(cc1)c1ccc(cc1)F)=O</chem>        | 26       | 0      |
| <chem>C(C([O-])=O)[C@@H](C([O-])=O)NC(c1ccc(c2ccc(cc2)F)n1)=O</chem>         | 27       | 1      |
| <chem>COC1ccc(cc1)c1ccc(c1)C(N[C@@H](CC([O-])=O)C([O-])=O)=O</chem>          | 28       | 1      |
| <chem>COC1ccc(cc1)c1ccc(C(N[C@@H](CC([O-])=O)C([O-])=O)n1</chem>             | 29       | 1      |
| <chem>C(C([O-])=O)[C@@H](C([O-])=O)NC(c1ccc(c1)c1ccc(cc1)OC(F)F)=O</chem>    | 30       | 1      |
| <chem>C(C([O-])=O)[C@@H](C([O-])=O)NC(c1ccc(c2ccc(cc2)OC(F)F)n1)=O</chem>    | 31       | 1      |
| <chem>C(C([O-])=O)[C@H](C([O-])=O)NC(c1ccc(o1)[Br])=O</chem>                 | TUG-1623 | 0      |
| <chem>Cc1c(C(N[C@@H](CC([O-])=O)C([O-])=O)c(c2ccccc2)no1</chem>              | TUG-1639 | 0      |
| <chem>C(C([O-])=O)[C@@H](C([O-])=O)NC(c1cc2ccccc2[nH]1)=O</chem>             | TUG-1640 | 0      |
| <chem>C(C([O-])=O)[C@@H](C([O-])=O)NC(c1ccc(c1)Oc1ccccc1)=O</chem>           | TUG-1641 | 0      |
| <chem>C(C([O-])=O)[C@@H](C([O-])=O)NC(c1ccc(cc1)Oc1ccccc1)=O</chem>          | TUG-1642 | 0      |
| <chem>C(C([O-])=O)[C@@H](C([O-])=O)NC(c1ccc(nc1)[Cl])=O</chem>               | TUG-1646 | 0      |

|                                                                         |          |   |
|-------------------------------------------------------------------------|----------|---|
| <chem>C(C([O-])=O)[C@@H](C([O-])=O)NC(c1ccnc(c1)[Cl])=O</chem>          | TUG-1647 | 0 |
| <chem>C(C([O-])=O)[C@@H](C([O-])=O)NC(c1cccc(n1)[Br])=O</chem>          | TUG-1648 | 0 |
| <chem>C(C([O-])=O)[C@@H](C([O-])=O)NC(c1ccnc1[Cl])=O</chem>             | TUG-1649 | 0 |
| <chem>C(C([O-])=O)[C@@H](C([O-])=O)NC(/C=C/c1ccc(cc1[Cl])[Cl])=O</chem> | TUG-1652 | 0 |
| <chem>C(C(N[C@@H](CC([O-])=O)C([O-])=O)c1c[nH]c2cccc12</chem>           | TUG-1658 | 0 |
| <chem>C(Cc1cccc1)C(N[C@@H](CC([O-])=O)C([O-])=O)</chem>                 | TUG-1674 | 0 |
| <chem>C(C([O-])=O)[C@@H](C([O-])=O)NC(COc1ccc(cc1)OC(F)(F)F)=O</chem>   | TUG-1675 | 0 |
| <chem>Cc1ccc(cc1)OCC(N[C@@H](CC([O-])=O)C([O-])=O)</chem>               | TUG-1677 | 0 |
| <chem>C(C([O-])=O)[C@@H](C([O-])=O)NC(COc1cccc1C#N)=O</chem>            | TUG-1678 | 0 |
| <chem>C(C([O-])=O)[C@@H](C([O-])=O)OC(c1ccc(c2ccc(cc2)F)o1)=O</chem>    | TUG-1679 | 0 |

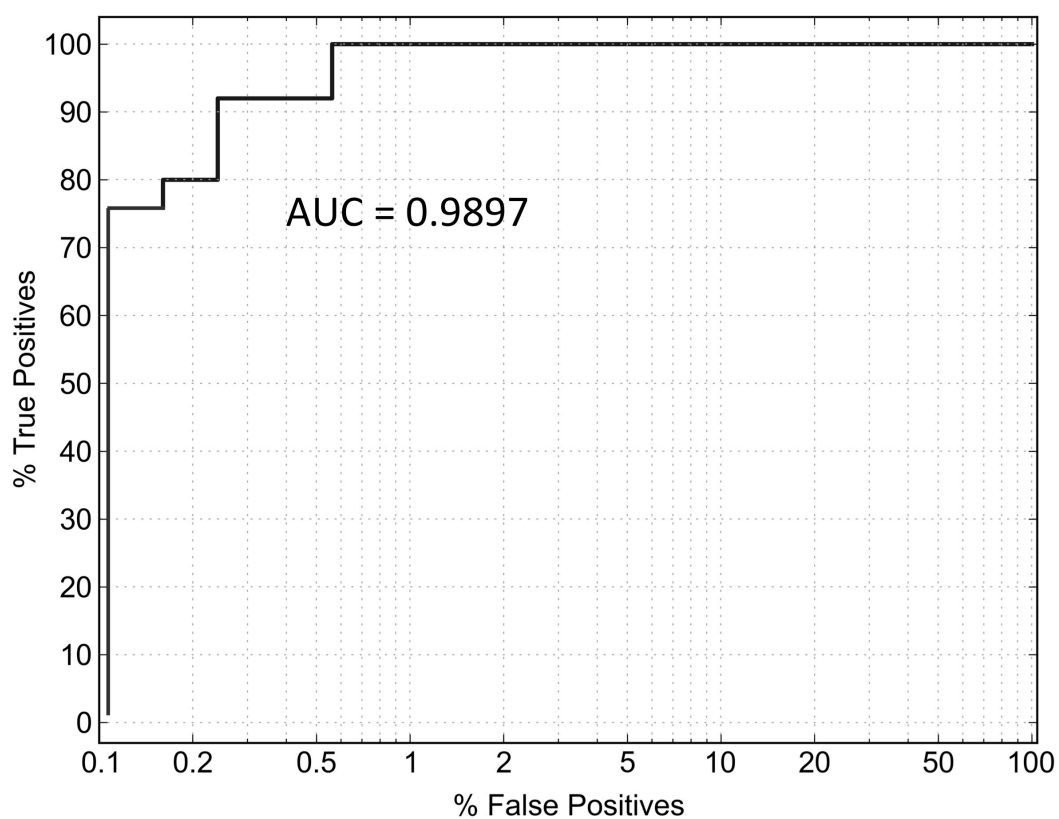

**Figure S2:** Model validation of the ALiBERO-optimised SUCNR1 models by a large-scale virtual ligand screening. The ROC-curve and area under the curve (AUC) value is shown for the combined performance of the best-performing receptor ensemble of generation 10 of the ALiBERO refinement. A ligand test set consisting of 25 actives and 1247 decoy molecules, that were derived from a similarity search based on the active compound **3** was used.
